# Supplementary material
Source: PubMed Central journal article supplement (PMC10105343)

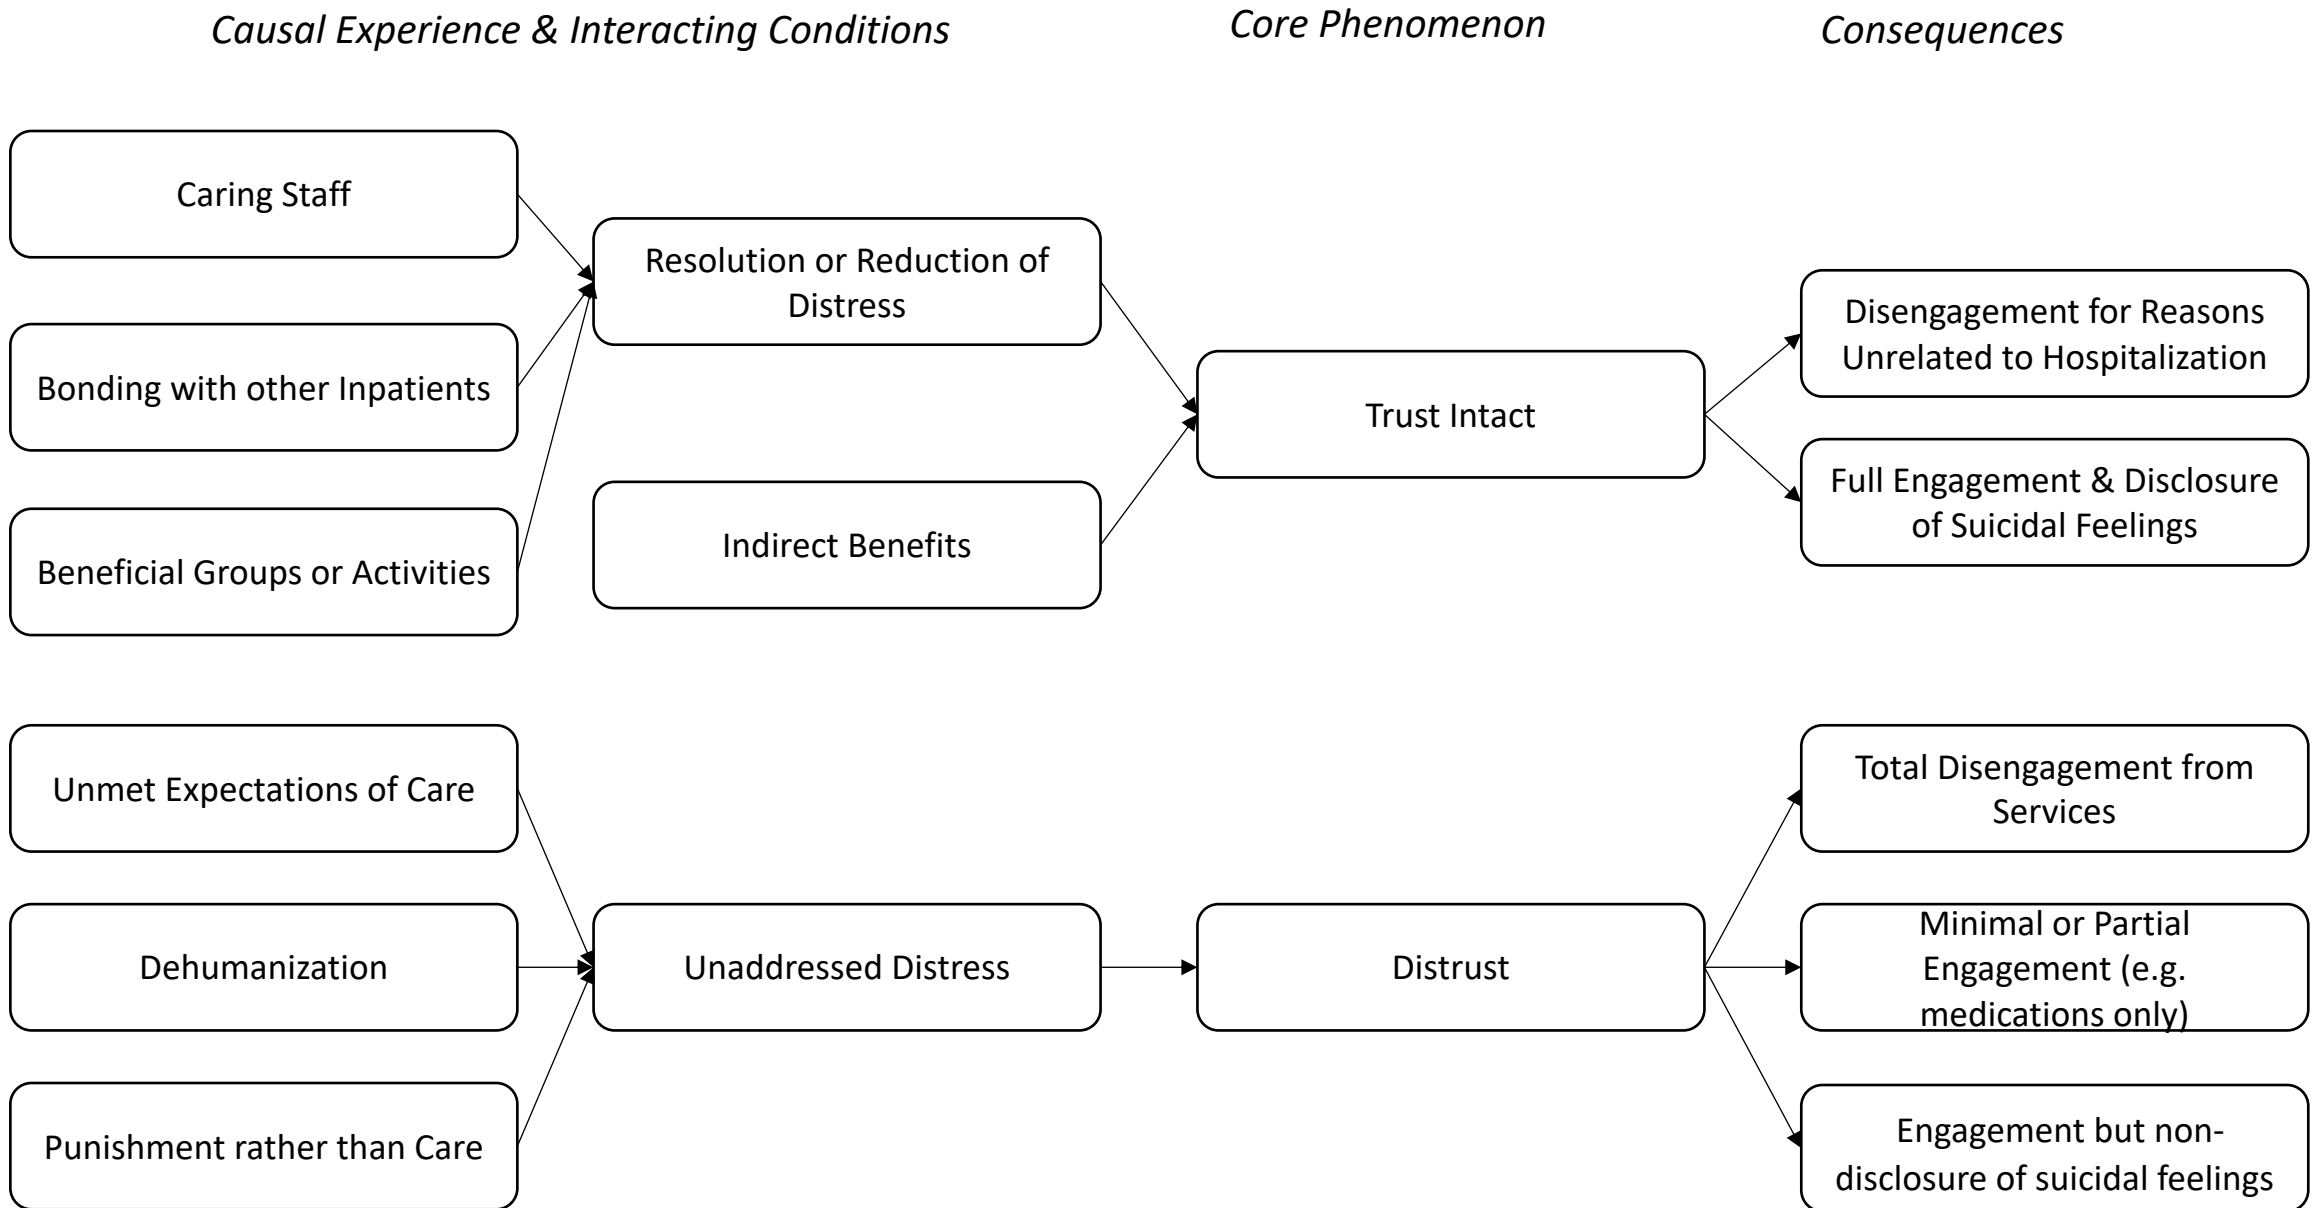

Figure 1. Conceptual Model of (Dis)trust Following Involuntary Hospitalization

Supplement: NIHMS1889895-supplement-Conceptual_Model_of__Dis_trust_Following_Involuntary_Hospitalization.pdf [file NIHMS1889895-supplement-Conceptual_Model_of__Dis_trust_Following_Involuntary_Hospitalization.pdf]
